# Supplementary material
Source: publisher figshare collection journal article supplement (https://f1000.figshare.com/articles/dataset/_/12465863)
Supplement: Supplementary file 1 [file 1]

## Sheet: Penicillin data
Penicillin
	50 (µg) Penicillin induced -zone of inhibition diameter analyses						100(µg) Penicillin induced -zone of inhibition diameter analyses
Replicate #	Chlamydomonas	CC45533				Replicate #	Chlamydomonas	CC45533
1	0	0				1	0	0
2	0	0				2	0	0
3	0	0				3	0	0
Chlamydomonas and CC4533 are resistant to Pencillin. As no zone of inhibitions were observed for both doses of penicillin, statistical anlayses were not performed.
									t Critical one-tail	2.91999
									P(T<=t) two-tail	0.0728274
									t Critical two-tail	4.30265

## Sheet: Polymyxin B data
	50 (µg) Polymyxin B-zone of inhibition diameter analyses						100 (µg) Polymyxin B-zone of inhibition diameter analyses		t-Test: Paired Two Sample for Means
Replicate #	Chlamydomonas	CC45533	t-Test: Paired Two Sample for Means			Replicate #	Chlamydomonas	CC45533
1	8.5	8.7				1	9.5	10.1		Chlamydomonas	CC45533
2	8.7	8.7		Chlamydomonas	CC45533	2	10	10.8	Mean	9.6	10.4333
3	8.4	8.8	Mean	8.53333	8.73333	3	9.3	10.4	Variance	0.13	0.123333
			Variance	0.0233333	0.00333333				Observations	3	3
			Observations	3	3				Pearson Correlation	0.75026
			Pearson Correlation	-0.755929					Hypothesized Mean Difference	0
			Hypothesized Mean Difference	0					df	2
			df	2					t Stat	-5.73539
			t Stat	-1.73205					P(T<=t) one-tail	0.0145402
			P(T<=t) one-tail	0.112702					t Critical one-tail	2.91999
			t Critical one-tail	2.91999					P(T<=t) two-tail	0.0290805
			P(T<=t) two-tail	0.225403					t Critical two-tail	4.30265
			t Critical two-tail	4.30265

## Sheet: Neomycin data
	50 (µg) Neomycin-zone of inhibition diameter analyses						100 (µg) Neomycin-zone of inhibition diameter analyses
Replicate #	Chlamydomonas	CC45533	t-Test: Paired Two Sample for Means			Replicate #	Chlamydomonas	CC45533	t-Test: Paired Two Sample for Means
1	9.5	13				1	11	14.7
2	10	14		Chlamydomonas	CC45533	2	11.1	15		Chlamydomonas	CC45533
3	9	13.4	Mean	9.5	13.4667	3	11.2	14.6	Mean	11.1	14.7667
			Variance	0.25	0.253333				Variance	0.01	0.0433333
			Observations	3	3				Observations	3	3
			Pearson Correlation	0.59604					Pearson Correlation	-0.240192
			Hypothesized Mean Difference	0					Hypothesized Mean Difference	0
			df	2					df	2
			t Stat	-15.2364					t Stat	-25.2357
			P(T<=t) one-tail	0.00213999					P(T<=t) one-tail	0.00078328
			t Critical one-tail	2.91999					t Critical one-tail	2.91999
			P(T<=t) two-tail	0.00427997					P(T<=t) two-tail	0.00156656
			t Critical two-tail	4.30265					t Critical two-tail	4.30265

## Sheet: Chloramphenicol
Chloramphenicol
	50 (µg) Chloramphenicol induced-zone of inhibition diameter analyses						100(µg) Chloramphenicol induced-zone of inhibition diameter analyses
Replicate #	Chlamydomonas	CC45533				Replicate #	Chlamydomonas	CC45533
1	0	0				1	0	0
2	0	0				2	0	0
3	0	0				3	0	0
Chlamydomonas and CC4533 are resistant to Chlroamphenicol. As no zones of inhibitions were observed for both doses of chloramphenicol, statistical anlayses were not performed.
									t Critical one-tail	2.91999
									P(T<=t) two-tail	0.0728274
									t Critical two-tail	4.30265
